# Supplementary material for: Nickel Foam-Supported Hierarchical NiCo2S4 Nanostructures as Efficient Electrocatalysts for the Methanol Oxidation Reaction
Source: MDPI journal article supplement (doi:10.3390/catal13071099), 2023-07-14
Supplement: s1 [file s1]

## Supplementary Materials

### **Nickel Foam-Supported Hierarchical NiCo<sub>2</sub>S<sub>4</sub> Nanostructures as Efficient Electrocatalysts for the Methanol Oxidation Reaction**

Dan Jin <sup>1</sup>, Wenting Cheng <sup>2</sup>, Shaoyun Wu <sup>3</sup>, Zhen Li <sup>4,\*</sup> and Zhenghua Wang <sup>2,\*</sup>

1 School of Pharmacy, Wannan Medical College, Wuhu 241002, China;  
jindan@wnmc.edu.cn

2 Key Laboratory of Functional Molecular Solids, Ministry of Education, College  
of Chemistry and Materials Science, Anhui Normal University, Wuhu 241000, China;  
2121011263@ahnu.edu.cn

3 Wuhu Medical and Health School, Wuhu 241100, China; ahxgx@163.com

4 College of Food Engineering, Anhui Science and Technology University,  
Fengyang 233100, China

\* Correspondence: lizhen@ahstu.edu.cn (Z.L.); zhwang@ahnu.edu.cn (Z.W.)

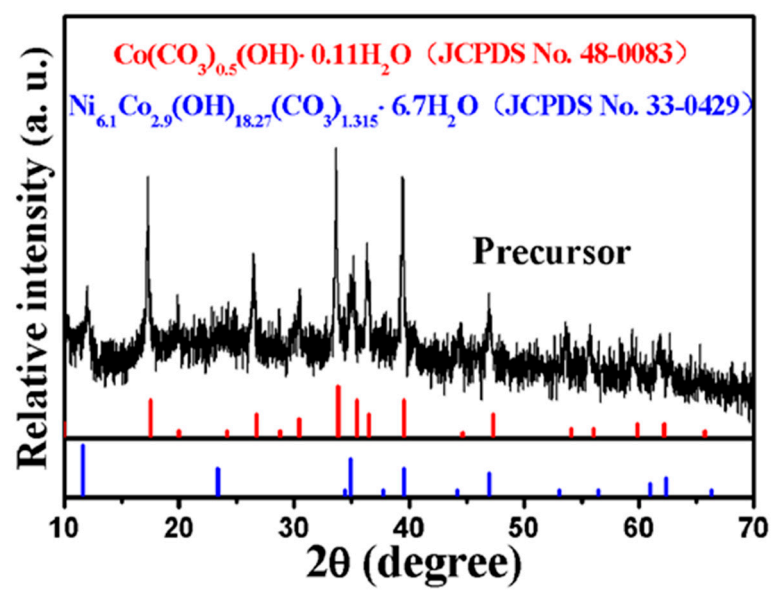

Figure S1. XRD pattern of the precursor.

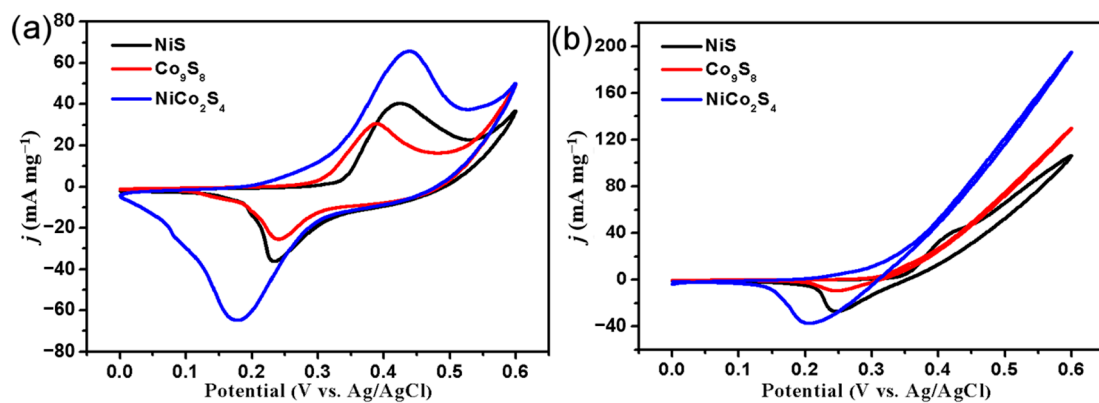

Figure S2. CV curves of the NiS/Ni foam, Co<sub>9</sub>S<sub>8</sub>/Ni foam and NiCo<sub>2</sub>S<sub>4</sub>/Ni foam electrodes: (a) in 1 mol dm<sup>-3</sup> KOH electrolyte; (b) in 1 mol dm<sup>-3</sup> KOH electrolyte with 0.5 mol dm<sup>-3</sup> methanol.
